# Supplementary material
Source: publisher figshare collection journal article supplement (https://sage.figshare.com/ndownloader/files/17868374)
Supplement: Supplementary file 1 [file 17868374]

# 1 Numerical simulation on Heat Extraction Performance of 2 Enhanced Geothermal System under the Different Well layout

3  
4  
5  
6  
7  
8  
9

## 10 Abstract

11 China has hundreds of thousands of oil and water wells, about 30 percent of which have been  
12 abandoned currently. If we can convert abandoned wells into geothermal wells, it will save lots of  
13 money and reduce drilling and completion time greatly. In this paper, six enhanced geothermal  
14 system (EGS) well layout schemes are proposed based on the utilization of abandoned oil-water  
15 wells and common oilfield well pattern. Six common injection-production well pattern in oilfield  
16 are combined to hot dry rock (HDR) production and the heat extraction performance is simulated.  
17 The results show that the injection well number and the location of injection wells have critical  
18 influence on the heat extraction performance. Under the same total injection mass flow rate, the  
19 injection well number is the key factor and the fracture area is the secondary factor on heat  
20 extraction when the HDR energy is enough. For electricity generation, the life span is 20.2, 19.2,  
21 19.0, 19.2, 18.2 and 13.9 years, the heat extraction ratio is 65.83, 57.35, 65.96, 62.79, 59.30 and  
22 43.09 % from case 1 to case 6, respectively. For heating demand, the life span is 30.0, 30.0, 29.9,  
23 30.0, 29.8, and 27.7 years, the heat extraction ratio is 78.91, 69.63, 77.02, 75.92, 72.27 and 58.94  
24 % from case 1 to case 6, respectively. The total injection mass flow rate and injection temperature  
25 also have the negative effect on the heat extraction performance. Case 1 (row parallel well layout),  
26 Case 3 (four-spot well layout) and Case 4 (five-spot well layout) is the good choice both for  
27 electricity generation and heating demand. This study provides good guidance for the selection  
28 and optimization of different EGS well layout.

29  
30  
31

## 32 Keywords

33 Hot Dry Rock, Enhanced Geothermal System, Well layout, Abandoned oil-water wells, Thermal-  
34 Hydraulic model

35  
36  
37

## 38 Introduction

1 In recent years, with the increase of energy consumption and the intensification of greenhouse  
2 effect, clean energy plays an increasingly important role in the energy field (Ahmadi et al., 2018;  
3 Ramezanizadeh et al. 2019). Hot Dry Rock is a kind of deep geothermal resource which is clean  
4 renewable and widely distributed (Lu, 2018; Li et al., 2019; Wang et al., 2019). Compared with  
5 solar, wind and tidal power, the exploitation of HDR is less affected by the environmental factors  
6 (Li et al., 2015; Zhang et al., 2019). EGS extracts heat from HDR reservoir through fluid injection  
7 and it is considered to be an important way to exploit HDR (Moya et al., 2018). Considering the  
8 environmental impacts and economic benefits, EGS is considered to be the best way for electricity  
9 generation (Xu et al., 2018). However, the establishment of EGS is a costly and complicated  
10 system engineering, reducing the cost and difficulty is an important way to accelerate the HDR  
11 development (Pan et al., 2018).

12 China has hundreds of thousands of oil and water wells, about 30 percent of which have been  
13 abandoned currently (Bu et al., 2012). If we can convert abandoned wells into geothermal wells, it  
14 will save lots of money and reduce drilling and completion time greatly (Caulk et al., 2017; Cheng  
15 et al., 2014; Davis et al., 2009). At the same time, the extracted heat can be used for oil  
16 exploitation and transportation and power supply for nearby oilfield (Kharseh et al., 2019).  
17 Moreover, there is a strong correlation between geothermal and oil-gas production. The data  
18 information of oil and gas exploration, drilling, completion and exploitation can be used for  
19 geothermal development and utilization (Nian et al., 2018; Yang et al., 2017). In this paper, six  
20 EGS well layout schemes are proposed based on the utilization of abandoned oil-water wells and  
21 common oilfield well pattern. Six common injection-production well pattern in oilfield are  
22 combined to HDR production and the heat extraction performance is simulated.

23 A proper selection of well layout may reduce the development cost and increase the heat  
24 extraction ratio (Ding et al., 2018; Li et al., 2018). The heat extraction performance of many kinds  
25 of well layout has been investigated currently. Yang et al. (2019) modeled the heat energy  
26 extraction performance in a triplet well layout and demonstrated that the well spacing, well radius,  
27 reservoir thickness and injection mass flow rate affect the heat extraction ratio significantly. Chen  
28 et al. (2017) simulated the heat extraction performance of doublet, triplet, quintuplet well layout  
29 and found that simply increasing the production well number is not necessary to improve the heat  
30 extraction performance of EGS, triplet well layout can perform better than quintuplet well layout  
31 or worse than an EGS with the standard doublet well layout. Xia et al. (2017) simulated horizontal  
32 doublet well layout which parallel injection and production wells connected by a set of single  
33 large wing fractures and proposed that 40 equidistant fractures along 1.2 km long parallel well  
34 section with well distance of 500 m would meet the industrial production-level system. There are  
35 many single-well geothermal systems, such as heat pipe single well (Huang et al., 2018),  
36 multilateral-well (Shi et al., 2019), tree-shaped wells (Liu et al., 2019), U-tube downhole (Lyu et  
37 al., 2018), and so on (Yan et al. 2019).

38 Although the previous simulation studies on heat extraction performance of different well  
39 layout are extensive, there is lack of a thorough and comprehensive comparison on heat extraction  
40 of application of oilfield injection scheme in HDR well layout. In this paper, the heat extraction  
41 performance of different well layout was investigated on the basis of the recovery and utilization  
42 of abandoned oil and water wells. Based on the injection scheme in oilfield, six ideal models for  
43 the HDR heat extraction are proposed. A thermal-hydraulic model is established to investigate the  
44 heat extraction performance of different well layout. Based on the model, the temperature

1distribution, pressure distribution, average production temperature, life span, average rock  
2temperature and heat extraction ratio are proposed to evaluate the heat extraction performance of  
3different well layout, the heat extraction performance of different well layout are compared, the  
4effects of injection mass flow rate and injection temperature on the heat extraction performance  
5are studied. This study provides good guidance for the selection and optimization of different EGS  
6well layout.

7

## 8Methodology

### 9Model assumptions

10In this work, we focus on the heat extraction performance of EGS under different combination of  
11fracture and well array. The computational model includes the following assumptions:

12 (1) The HDR reservoir rock is homogenous and isotropic. The density, porosity, permeability,  
13heat conductivity and heat capacity at constant pressure of HDR reservoir rock consider to be  
14constant under the heat extraction condition. The HDR reservoir is saturated with water before the  
15heat extraction operation.

16 (2) The water keeps in liquid state under the heat extraction condition, because the pressure  
17and temperature meet the conditions of to keep it in liquid state (the specification of water phase  
18diagram see **Figure 1**). The density, dynamic viscosity, heat conductivity and heat capacity at  
19constant pressure of water changes with temperature (see **Figure 2** – **Figure 5**).

20 (3) The permeability of the rock matrix is relatively lower, almost impermeable. Assuming  
21there is a fracture between each injection well and production well as the key heat extraction  
22channel. The fracture penetrates through the computational reservoir along corresponding the  
23injection well and production well. The maximum distance among the injection well keeps  
24consistent under different well layout. The reservoir descriptions of computational model are  
25shown in **Table 2**.

### 26Mathematical equations

27The flow of water is laminar flow and subject to Darcy's law. Firstly, according to the mass  
28conservation equation and Darcy law, the water flow in the porous media and the Darcy seepage  
29velocity  $u$  can be described as (Liang et al., 2016)

$$30 \quad \frac{\partial(\rho_w \varepsilon_p)}{\partial t} + \nabla \cdot (\rho_w u) = -Q_m \quad (1)$$

$$31 \quad u = -\frac{k}{\mu_w} (\nabla p + \rho_w g \nabla z) \quad (2)$$

32 where  $\rho_w$  denotes water density,  $\varepsilon_p$  denotes the rock matrix porosity,  $t$  denotes the time,  $\nabla$   
33 denotes the Hamiltonian operator,  $u$  denotes the Darcy seepage velocity,  $Q_m$  denotes the source  
34 term, which is the mass transfer between the rock matrix and fractures,  $k$  denotes the rock matrix  
35 permeability,  $\mu_w$  denotes water viscosity,  $P$  denotes the pressure and  $\rho_w g \nabla z$  denotes the  
36 gravity term.

37 The rock matrix is regarded as elastic porous storage and the effect of pressure on porosity is  
38considered

$$39 \quad \frac{\partial(\rho_w \varepsilon_p)}{\partial t} = \varepsilon_p \frac{\partial \rho_w}{\partial t} + \rho_w \frac{\partial \varepsilon_p}{\partial p} \frac{\partial p}{\partial t} \quad (3)$$

1 According to the state equation of the rock matrix, the rock compressibility can be described  
2 as

$$3 \quad C_m = \frac{1}{\varepsilon_p} \frac{\partial \varepsilon_p}{\partial p} \quad (4)$$

4 Define  $S$  as the storage coefficient of rock matrix and it can be described as

$$5 \quad S = \varepsilon_p C_m \quad (5)$$

6 Substituting Equation (2)-(5) into (1), the seepage field equation of water in the porous media  
7 is obtained

$$8 \quad \varepsilon_p \frac{\partial \rho_w}{\partial t} - \nabla \cdot \rho_w \left[ \frac{k}{\mu} (\nabla p + \rho_w g \nabla z) \right] = -\rho_w S \frac{\partial p}{\partial t} - Q_m \quad (6)$$

9 Similarly, the seepage field equation of water in the fracture can be expressed as

$$10 \quad d_f \varepsilon_f \frac{\partial \rho_w}{\partial t} - \nabla_T \cdot d_f \rho_w \left[ \frac{k_f}{\mu} (\nabla_T p + \rho_w g \nabla_T z) \right] = -d_f \rho_w S_f \frac{\partial p}{\partial t} + d_f Q_m \quad (7)$$

11 where  $d_f$  denotes the fracture aperture,  $\varepsilon_f$  denotes the fracture porosity,  $\nabla_T$  denotes the  
12 gradient operator on the fracture's tangential plane,  $k_f$  denotes the fracture permeability and  $S_f$   
13 denotes the storage coefficient of fracture.

14 From previous studies (Cao et al., 2016; Jiang et al., 2014), the local thermal equilibrium is  
15 applicable under the condition of the heat transfer coefficient and area is relatively large, the  
16 fracture aperture is relatively small. Therefore, in this work the local thermal equilibrium theory is  
17 adopted to investigate the temperature field.

18 According to the energy conservation equation, the heat transfer process in the porous media  
19 can be described as (Xu et al., 2015; Saeid et al., 2013)

$$20 \quad (\rho C_p)_{\text{eff}} \frac{\partial T}{\partial t} + \rho_w C_{p,w} \mathbf{u} \cdot \nabla T - \nabla \cdot (\lambda_{\text{eff}} \nabla T) = -Q_{m,E} \quad (8)$$

21 where  $T$  denotes the temperature of porous media,  $C_{p,w}$  denotes the water specific heat,

22  $Q_{m,E}$  denotes the heat transfer between the porous media and fractures,  $(\rho C_p)_{\text{eff}}$  denotes the  
23 effective volumetric capacity,  $\lambda_{\text{eff}}$  denotes the effective thermal conductivity. According to the  
24 volume average model,  $(\rho C_p)_{\text{eff}}$  and  $\lambda_{\text{eff}}$  can be described as

$$25 \quad (\rho C_p)_{\text{eff}} = (1 - \varepsilon_p) \rho_s C_{p,s} + \varepsilon_p \rho_w C_{p,w} \quad (9)$$

$$26 \quad \lambda_{\text{eff}} = (1 - \varepsilon_p) \lambda_s + \varepsilon_p \lambda_w \quad (10)$$

27 where  $\rho_s$  denotes density of the rock matrix,  $C_{p,s}$  and  $C_{p,w}$  denote the specific heat of the  
28 rock matrix and water,  $\lambda_s$  and  $\lambda_w$  denote the thermal conductivity of the rock matrix and water,  
29 respectively.

30 Similarly, the heat transfer process in the fracture can be described as

1

$$d_f(\rho C_p)_{\text{eff}} \frac{\partial T}{\partial t} + d_f \rho_w C_{p,w} u \cdot \nabla_T T - \nabla_T \cdot (d_f \lambda_{\text{eff}} \nabla T) = d_f Q_{m,E} \quad (11)$$

## 2Model and parameters under different well layout

3In this work, six ideal models are established for the HDR heat extraction according to the oil field  
4well layout. The case 1 is row opposite well layout, two production wells in the middle of  
5reservoir and four injection wells are located on opposite sides to the production well. The case 2  
6is row cross well layout, two production wells in the middle of reservoir and six injection wells  
7cross with the production wells on both sides. The case3 is four-spot well layout, three injection  
8wells are located at the apex of an equilateral triangle with a side length of 400m and the  
9production well is located at the center of the triangle. The case 4 is five-spot well layout, four  
10injection wells are located at the apex of a square with a side length of 400m and the production  
11well is located at the center of the square. The case 5 is seven-spot well layout, six injection wells  
12are located at the apex of the hexagon with a side length of 200m and the production well is  
13located at the center of the hexagon. The case 6 is nine-spot well layout, eight injection wells are  
14located at the apex and midpoint of the square with a side length of 400m and the production well  
15is located at the center of the square. The six models differ greatly in well layout, but there are  
16common points among different models. First, for each model, there is a fracture between each  
17injection well and production well as the key heat extraction channel, and the fracture penetrates  
18through the reservoir along corresponding the injection well and production well. Second, the  
19maximum distance among the injection well keeps consistent under different well layout and the  
20maximum distance is set as 400m in this work.

21 The schematic of different well array and the computational model are shown in **Figure 6.**  
22and **Figure 7.** respectively. The specific spatial descriptions of computational model are shown in  
23**Table 2.**

24 The computational model mentioned above is adopted to simulate the heat extraction process  
25of different well layout. The specific initial and boundary conditions are shown as below:

26 (1) The HDR reservoir rock initial temperature at the top is 473.15 K. The temperature  
27increases linearly with the depth and the geothermal gradient is 0.03 K/m. The initial temperature  
28of other outer boundaries can be calculated by the initial temperature at the top and the geothermal  
29gradient. The outer boundaries are set as thermal insulation.

30 (2) The HDR reservoir rock initial pressure at the top is 40 MPa. The pressure increases  
31linearly with the depth and the pressure gradient is 0.005 MPa/m. The **initial pressure** of other  
32outer boundaries can be calculated by the initial pressure at the top and the pressure gradient. Set  
33production pressure to 30 MPa.

34 (3) The injection wells are set as inlet boundaries. The injection temperature is set as 293.15K  
35and the injection mass flow rate is set as 120 kg/s. The production wells are set as outlet  
36boundaries. The production pressure is set as 30 MPa.

37 The specific descriptions mentioned above can be seen in **Table 3.**

38 In order to guarantee the same simulation condition, adopting the same principle to mesh  
39computational model under different well layout. All the domains adopt the free tetrahedral mesh.  
40For the injection and production wells adopt the extra fine mesh and the maximum element size is  
414m. The other domain adopts the fine mesh. The specific mesh descriptions of different well  
42layout can be seen in **Table 4.** The mesh diagram of different well layout can be seen in **Figure 8.,**

1 the legend represents the element size.

## 2 Results and Discussion

### 3 Temperature and pressure distribution

4 In this section, the heat extraction performance of different well layout is compared under the total  
5 injection rate is 120 kg/s. **Figure 9.** and **Figure 10.** illustrate the temperature and pressure  
6 distribution of different well layout at 30th year. It can be observed that the heat extraction ratio  
7 and thermal residual position is different from case 1 to case 6. The production pressure keeps at  
8 30 MPa and the injection pressure is much higher than production well to guarantee the fluid flow.

9 Since the total injection mass flow rate is the same, it can be speculated that the difference in  
10 temperature and pressure distribution is mainly caused by the combination of different well layout  
11 and fractures.

12 The Darcy velocity field and pore pressure field on x-y plane of case 1 is shown in **Figure 11.**  
13 From **Figure 11.**, it is found that the streamline and pressure contour near injection and production  
14 well is much denser than the rest of region. It indicates that the vicinity of injection and production  
15 well have higher velocity gradient and pressure gradient. Moreover, the pressure contours near the  
16 injection and production well are concentric circles, concluding that the wells are essentially  
17 boundaries of uniform pressure.

18 Driven by the pressure difference, working fluid flow from the injection well, through the  
19 rock matrix and fractures into the production well, thus the HDR heat extraction process can be  
20 realized. Compare the **Figure 11.** (a) and **Figure 11.** (b), it is found that where the pressure  
21 gradient small, the fluid flow velocity is small, it indicates that the fluid flow velocity mainly  
22 depends on the pressure gradient. Compare the **Figure 11.** and **Figure 8.**, it is found that the  
23 thermal residual region of case 1 is where both the pressure gradient and the fluid flow velocity  
24 are small. The law is also applicable to case 2 – case 6 and the pressure contour and streamline of  
25 case 2 – case 6 is shown in **Figure 12.** – **Figure 16.** From above, it can be concluded that the  
26 injection well number and the location of injection wells have critical influence on the thermal  
27 extraction performance. It is necessary to choose proper well layout according to actual demand.

28

### 29 Average production temperature and life span

30 **Figure 17.** demonstrates the average production temperature and life span of different well layout  
31 under the total injection mass flow rate is 120 kg/s. From **Figure 17.**, it is found that the average  
32 production temperature declines with the heat extraction time increases, and the decline trend is  
33 different under different well layout. In the first 17 years, the average production temperature of  
34 case 3 is higher than other well layout and after the 17<sup>th</sup> year, the average production temperature  
35 of case 1 is the highest. The average production temperature of case 6 is always the lowest.

36 For case 2 and case 3, the injection-production wells ratio is the same (both are three), the  
37 fracture area of case 2 is larger than that of case 3. In the first 19 years, the average temperature of  
38 case 3 is higher than that of case 2 and after the 20<sup>th</sup> year, the result is contrary. It can be  
39 speculated that the production temperature is related to the fracture area when the HDR energy is  
40 enough, the smaller the fracture area, the higher the average production temperature.

41 For case 3 and case 5, the production well number and fracture area are same, the injection  
42 well number is three and six, respectively. In the first 21 years, the average temperature of case 3  
43 is higher than that of case 5 and after the 22<sup>th</sup> year, the average temperature is almost the same. It

1 can be speculated that the production temperature is related to the injection well number when the  
 2 HDR energy is enough, the fewer the injection well number, the higher the average production  
 3 temperature.

4 In the first few years, the HDR energy is enough, it is found that the average production  
 5 temperature is case 3, case 1, case 4, case 5, case 2 and case 6 from high to low, respectively. The  
 6 injection well number is 3, 4, 4, 6, 6 and 8, respectively. The fracture area is  $8.3 \times 10^5$ ,  $5.0 \times 10^5$ ,  
 $77.1 \times 10^5$ ,  $8.3 \times 10^5$ ,  $11.2 \times 10^5$  and  $12.1 \times 10^5$  m<sup>2</sup>, respectively. From the data above, it can be  
 8 concluded that the injection well number is the key factor on the average production temperature.

9 When the injection well number is the same, the fracture area plays an important role on the  
 10 average production temperature. Both the injection well number and fracture area have a negative  
 11 effect on the average production temperature.

12 The average production temperature determines the life span of the enhanced geothermal  
 13 system (EGS). The production temperature should be greater than 378.51 and 323.15 K to meet  
 14 the electricity generation and heating demand, respectively. For electricity generation, the life span  
 15 is 20.2, 19.2, 19.0, 19.2, 18.2 and 13.9 years from case 1 to case 6, respectively. For heating  
 16 demand, the life span is 30.0, 30.0, 29.9, 30.0, 29.8, and 27.7 years case 1 to case 6, respectively.  
 17 Since the maximum calculation time is 30 years, there may be errors in the life span statics for  
 18 heating demand.

#### 19 Average rock temperature and heat extraction ratio

20 The production mass flow rate is often used as an evaluation criterion in previous studies and it  
 21 can be calculated by the velocity integral of specific two-dimension region in 3D model. The  
 22 calculation result is different with the different integral region. For a certain well layout, we can  
 23 choose a specific integral region (always the partial fracture region) to calculate the production  
 24 mass flow rate and use it as an evaluation criterion for sensitivity analysis. However, in this work,  
 25 the heat extraction of different well layout is mainly compared, there is no identical integral region  
 26 to choose, and the calculation results of the production mass flow rate with different integral  
 27 region cannot be put in the same standard for comparison.

28 Therefore, other characteristic parameters should be found to evaluate the heat extraction  
 29 process. The average rock temperature is a reliable characteristic parameter. The simulation model  
 30 is an ideal model and ignore the energy consumption. The lower the average rock temperature is,  
 31 the better the heat extraction effect is and the heat extraction ratio calculated by the average rock  
 32 temperature is more accurate. The definition of the heat extraction ratio  $\eta$  is given by

$$33 \quad \eta = \frac{\iiint_V \rho_s C_{p,s} (T_{r0} - T_r(t)) dv}{\iiint_V \rho_s C_{p,s} (T_{r0} - T_{in}) dv} \quad (12)$$

34 where  $T_{r0}$  denotes the initial temperature of the porous matrix,  $T_r(t)$  denotes the temperature  
 35 at time instant,  $T_{in}$  denotes the injection temperature.

36 **Figure 18.** demonstrates the average rock temperature and heat extraction ratio during 30  
 37 years of different well layout under the total injection mass flow rate is 120 kg/s. From **Figure 18.**,  
 38 it is found that the heat extraction ratio is case 3, case 1, case 4, case 5, case 2 and case 6 from high  
 39 to low in the first 25 years, respectively. The results of heat extraction ratio are consistent with the

1 average production temperature.

2 In the last 5 years, the heat extraction ratio is case 1, case 3, case 4, case 5, case 2 and case 6  
3 from high to low, respectively. The fracture area is  $5.0 \times 10^5$ ,  $8.3 \times 10^5$ ,  $7.1 \times 10^5$ ,  $8.3 \times 10^5$ ,  $11.2 \times 10^5$   
4 and  $12.1 \times 10^5$  m<sup>2</sup>, respectively. If the simulation time is prolonged to 40 years, the heat extraction  
5 ratio of case 4 may surpass that of case 3. Therefore, it can be concluded that the injection well  
6 number is the key factor and the fracture area is the secondary factor on heat extraction when the  
7 HDR energy is enough, the influence of the injection well number is weakened and the fracture  
8 area is the key factor when the HDR energy is not enough.

9 **Figure 19.** demonstrates the heat extraction ratio for (a) Electricity generation and (b)  
10 Heating demand of different well layout under the total injection mass flow rate is 120 kg/s. Under  
11 the simulation condition, for electricity generation, the heat extraction ratio is 65.83, 57.35, 65.96,  
12 62.79, 59.30 and 43.09 % from case 1 to case 6, respectively. For heating demand, the heat  
13 extraction ratio is 78.91, 69.63, 77.02, 75.92, 72.27 and 58.94 %, respectively. Since the maximum  
14 calculation time is 30 years, there may be errors in the heat extraction statics for heating demand.  
15 Under the simulation condition, Case 1, Case 3 and Case 4 is the good choice both for electricity  
16 generation and heating demand.

#### 17 Effect of injection mass flow rate

18 The simulation results above is calculated under the total injection mass flow rate is 120 kg/s, in  
19 this section, the injection mass flow rate of single well is set as 40 kg/s to compare the heat  
20 extraction process of different well layout.

21 **Figure 20.** demonstrates the average production temperature and heat extraction ratio of  
22 different well layout under the single well injection mass flow rate is 40 kg/s. From the **Figure**  
23 **20.**, we can see that average production temperature is case 3, case 1, case 4, case 5, case 2 and  
24 case 6 from high to low, respectively. The total injection mass flow rate is 120, 160, 160, 180, 180,  
25 320 kg/s, respectively. Under the same single well injection mass flow rate, the total injection  
26 mass flow rate depends on the injection well number, the more the injection wells, the lower the  
27 average production temperature and the shorter the time to reach a stable temperature. When the  
28 injection well number is the same, the fracture area plays an important role on the average  
29 production temperature. The larger the fracture area, the lower the average production  
30 temperature. The injection well number determines the average production temperature in the  
31 whole process.

32 **Figure 21.** demonstrates the heat extraction ratio for (a) Electricity generation and (b)  
33 Heating demand of different well layout under the single well injection mass flow rate is 40 kg/s.  
34 Under the simulation condition, for electricity generation, the life span and heat extraction ratio  
35 are 14.8, 8.2, 19.0, 14.1, 8.5, 4.6 years and 65.20, 53.40, 65.96, 62.31, 57.64, 40.50 % from case 1  
36 to case 6, respectively. For heating demand, the life span and heat extraction ratio are 20.2, 19.2,  
37 19.0, 19.2, 18.2, 13.9 years and 81.90, 69.13, 77.02, 77.28, 72.18 and 58.21 %, respectively. Since  
38 the maximum calculation time is 30 years, there may be errors in the heat extraction statics for  
39 heating demand.

40 From the static results above, it is found that the total injection mass flow rate has negative  
41 effect on the life span and heat extraction ratio for the same well layout. Under the simulation  
42 condition, Case 1, Case 3 and Case 4 is the good choice both for electricity generation and heating  
43 demand.

44



## 1 Effect of injection temperature

2 **Figure 22.** compares the average production temperature and heat extraction ratio under the  
3 injection temperature is 293.15 and 303.15 K. For case 1, when the injection temperature increases  
4 from 293.15 to 303.15 K, the life span for electricity generation is extended from 20.2 to 20.9  
5 years and the heat extraction ratio decreased from 65.82 to 62.79. The same law can be found in  
6 case 2 to case 6, too. The higher the injection temperature, the lower the average production  
7 temperature and the heat extraction ratio. The low injection temperature is beneficial to the heat  
8 extraction for all the cases. The heat extraction ratio of Case 1, Case 3 and Case 4 is greatly  
9 affected by the injection temperature.

## 10 Conclusions

11 In this paper, six EGS well layout schemes are proposed based on the utilization of abandoned oil-  
12 water wells and common oilfield well pattern. Six common injection-production well pattern in  
13 oilfield are combined to HDR production and the heat extraction performance is simulated. A  
14 thermal-hydraulic model is established to investigate the heat extraction performance of different  
15 well layout. Based on the model, the temperature distribution, pressure distribution, average  
16 production temperature, life span, average rock temperature and heat extraction ratio are proposed  
17 to evaluate the heat extraction performance of different well layout, the heat extraction  
18 performance of different well layout are compared, the effects of injection mass flow rate and  
19 injection temperature on the heat extraction performance are studied. In summary, the key points  
20 this work includes:

21 (1) Six ideal models for the HDR heat extraction are proposed based on the recovery and  
22 utilization of abandoned oil and water wells. The models are row opposite, row cross, four-spot,  
23 five-spot, seven-spot and nice-spot well layout from case 1 to case 6, respectively.

24 (2) The vicinity of injection and production well have higher velocity gradient and pressure  
25 gradient. The fluid flow velocity mainly depends on the pressure gradient and the thermal residual  
26 region is where both the pressure gradient and the fluid flow velocity are small. The injection well  
27 number and the location of injection wells have critical influence on the heat extraction  
28 performance. It is necessary to choose proper well layout according to actual demand.

29 (3) Under the same total injection mass flow rate, the injection well number is the key factor  
30 and the fracture area is the secondary factor on heat extraction when the HDR energy is enough,  
31 the influence of the injection well number is weakened and the fracture area is the key factor when  
32 the HDR energy is not enough. Both the injection well number and fracture area have a negative  
33 effect on the average production temperature. Under the same total injection mass flow rate, Case  
34 1, Case 3 and Case 4 is the good choice both for electricity generation and heating demand. For  
35 electricity generation, the life span is 20.2, 19.2, 19.0, 19.2, 18.2 and 13.9 years, the heat  
36 extraction ratio is 65.83, 57.35, 65.96, 62.79, 59.30 and 43.09 % from case 1 to case 6,  
37 respectively. For heating demand, the life span is 30.0, 30.0, 29.9, 30.0, 29.8, and 27.7 years, the  
38 heat extraction ratio is 78.91, 69.63, 77.02, 75.92, 72.27 and 58.94 % from case 1 to case 6,  
39 respectively.

40 (4) Under the same single injection mass flow rate, the total injection mass flow rate depends  
41 on the injection well number, the more the injection wells, the lower the average production  
42 temperature and the shorter the time to reach a stable temperature. Under the same single well  
43 injection mass flow rate, Case 1, Case 3 and Case 4 is the good choice both for electricity

1 generation and heating demand. Under the same total injection mass flow rate, the higher the  
2 injection temperature, the lower the average production temperature and the heat extraction ratio.  
3 The heat extraction ratio of Case 1, Case 3 and Case 4 is greatly affected by the injection  
4 temperature.

5 However, the hydraulic-mechanical couple is not taken into consideration in this paper, the  
6 heat extraction performance of six EGS well layout need further study in the future.

## 7 Acknowledgements

8 The authors wish to thank Prof Shibin Li.

## 9 Declaration of conflicting interests

10 The author(s) declared no potential conflicts of interest with respect to the research,  
11 authorship, and/ or publication of this article.

## 12 Funding

13

14

15

## 16 ORCID iD

17

## 18 Appendix

|           |                                                                |
|-----------|----------------------------------------------------------------|
| Case 1    | Row opposite well layout                                       |
| Case 2    | Row cross well layout                                          |
| Case 3    | Four-spot well layout                                          |
| Case 4    | Five-spot well layout                                          |
| Case 5    | Seven-spot well layout                                         |
| Case 6    | Nine-spot well layout                                          |
| $C_m$     | Rock compressibility, $\text{Pa}^{-1}$                         |
| $C_{p,w}$ | Water specific heat, $\text{J}/(\text{kg}\cdot\text{K})$       |
| $C_{p,s}$ | Rock matrix specific heat, $\text{J}/(\text{kg}\cdot\text{K})$ |
| $d_f$     | Fracture aperture, m                                           |
| EGS       | Enhanced Geothermal System                                     |

|                    |                                                          |
|--------------------|----------------------------------------------------------|
| HDR                | Hot Dry Rock                                             |
| $k$                | Rock matrix permeability, m <sup>2</sup>                 |
| $k_f$              | Fracture permeability, m <sup>2</sup>                    |
| $p$                | Pressure, Pa                                             |
| $Q_m$              | the mass transfer between the rock matrix and fractures  |
| $Q_{m,E}$          | the heat transfer between the porous media and fractures |
| $S$                | Storage coefficient of rock matrix, Pa <sup>-1</sup>     |
| $S_f$              | Storage coefficient of fracture, Pa <sup>-1</sup>        |
| $t$                | Time, s                                                  |
| $T$                | Temperature of porous media, K                           |
| $T_{in}$           | Injection temperature, K                                 |
| $T_p$              | Average production temperature, K                        |
| $T_r$              | Average rock temperature, K                              |
| $T_{ro}$           | Initial temperature of the porous matrix, K              |
| $u$                | Darcy seepage velocity, m/s                              |
| $\rho_s$           | Rock matrix density, kg/m <sup>3</sup>                   |
| $\rho_w$           | Water density, kg/m <sup>3</sup>                         |
| $(\rho C_p)_{eff}$ | Effective volumetric capacity,                           |
| $\mu_w$            | Water viscosity, Pa·s                                    |
| $\varepsilon_f$    | Fracture porosity, %                                     |
| $\varepsilon_p$    | Rock matrix porosity, %                                  |
| $\nabla$           | Hamiltonian operator                                     |
| $\nabla_T$         | gradient operator on the fracture's tangential plane     |
| $\lambda_{eff}$    | Effective thermal conductivity, W/(m·K)                  |
| $\lambda_s$        | Thermal conductivity of rock matrix, W/(m·K)             |
| $\lambda_w$        | Thermal conductivity of water, W/(m·K)                   |
| $\eta$             | Heat extraction ratio, %                                 |

## 1References

- 2Ahmadi M H, Ghazvini M, Sadeghzadeh M, et al. (2018) Solar power technology for electricity 3generation: a critical review. *Energy Science & Engineering* 6(5): 340-361.
- 4Ramezanizadeh M, Nazari M A, Ahmadi M H, et al. (2019) A review on the approaches applied 5for cooling fuel cells. *International Journal of Heat and Mass Transfer* 139: 517-525.
- 6Bu X, Ma W and Li H (2012) Geothermal energy production utilizing abandoned oil and gas 7wells. *Renewable Energy* 41: 80-85.
- 8Cao W, Huang W and Jiang F (2016) A novel thermal–hydraulic–mechanical model for the

1 enhanced geothermal system heat extraction. *International Journal of Heat and Mass Transfer*  
2 100: 661-671.

3 Caulk RA and Tomac I (2017) Reuse of abandoned oil and gas wells for geothermal energy  
4 production. *Renewable Energy* 112: 388-397.

5 Chen J and Jiang F (2015) Designing multi-well layout for enhanced geothermal system to better  
6 exploit hot dry rock geothermal energy. *Renewable Energy* 74: 37-48.

7 Cheng W, Li T, Nian Y, et al. (2014) Evaluation of working fluids for geothermal power  
8 generation from abandoned oil wells. *Applied Energy* 118: 238-245.

9 Davis AP and Michaelides EE (2009) Geothermal power production from abandoned oil wells.  
10 *Energy* 34: 866-872.

11 Ding J and Wang S (2018) 2D modeling of well array operating enhanced geothermal system.  
12 *Energy* 162: 918-932.

13 Huang W, Cao W and Jiang F (2018) A novel single-well geothermal system for hot dry rock  
14 geothermal energy exploitation. *Energy* 162: 630-644.

15 Jiang F, Chen J, Huang W et al. (2014) A three-dimensional transient model for EGS subsurface  
16 thermo-hydraulic process. *Energy* 72: 300-310.

17 Kharseh M, Al-Khawaja M and Hassani F (2019) Optimal utilization of geothermal heat from  
18 abandoned oil wells for power generation. *Applied Thermal Engineering* 153: 536-542.

19 Li K, Bian H, Liu C, et al. (2015) Comparison of geothermal with solar and wind power  
20 generation systems. *Renewable and Sustainable Energy Reviews*. 42: 1464-1474.

21 Li S, Xu T, Zhang S, et al. (2019) Hot dry rock geothermal resource potential in the Wudalianchi  
22 volcanic field, NE CHINA: Implications from geophysical exploration. *Energy Exploration &*  
23 *Exploitation* 37(2): 663-676.

24 Li X, and Zhu D (2018) Temperature Behavior During Multistage Fracture Treatments in  
25 Horizontal Wells. *Society Petroleum Engineering* 33: 522-538.

26 Liang B, Jiang H, Li J, et al. (2016) A systematic study of fracture parameters effect on fracture  
27 network permeability based on discrete-fracture model employing Finite Element Analyses.  
28 *Journal of Natural Gas Science and Engineering* 28: 711-722.

29 Liu Y, Wang G, Yue G, et al. (2019) Comparison of enhanced geothermal system with water and  
30 CO<sub>2</sub> as working fluid: A case study in Zhacanggou, Northeastern Tibet, China. *Energy*  
31 *Exploration & Exploitation* 37(2): 736-755.

32 Lu S-M (2018) A global review of enhanced geothermal system (EGS). *Renewable and*  
33 *Sustainable Energy Reviews* 81: 2902-2921.

34 Lyu Z, Song X, Li G, et al. (2018) Numerical analysis of characteristics of a single U-tube  
35 downhole heat exchanger in a geothermal well. *Geothermics* 72: 15-23.

36 Moya D, Aldás C and Kaparaju P (2018) Geothermal energy: Power plant technology and direct  
37 heat applications. *Renewable and Sustainable Energy Reviews* 94: 889-901.

38 Nian Y and Cheng W (2018) Evaluation of geothermal heating from abandoned oil wells. *Energy*  
39 142: 592-607.

40 Pan S, Gao M, Shah KJ, et al. (2019) Establishment of enhanced geothermal energy utilization  
41 plans: Barriers and strategies. *Renewable Energy* 132: 19-32.

42 Saeid S, Al-Khoury R and Barends F (2013) An efficient computational model for deep low-  
43 enthalpy geothermal systems. *Computers & geosciences* 51: 400-409.

44 Shi Y, Song X, Wang G, et al. (2019) Numerical study on heat extraction performance of a

1multilateral-well enhanced geothermal system considering complex hydraulic and natural  
2fractures. *Renewable Energy* 141: 950-963.

3Wang Z, Jiang G, Zhang C, et al. (2019) Thermal regime of the lithosphere and geothermal  
4potential in Xiong'an New Area. *Energy Exploration & Exploitation* 37(2): 787-810.

5Xia Y, Plummer M, Mattson E, et al. (2017) Design, modeling, and evaluation of a doublet heat  
6extraction model in enhanced geothermal systems. *Renewable Energy* 105: 232-47.

7Xu C, Dowd P A and Tian Z F (2015) A simplified coupled hydro-thermal model for enhanced  
8geothermal systems. *Applied Energy* 140: 135-145.

9Xu T, Yuan Y, Jia X, et al. (2018) Prospects of power generation from an enhanced geothermal  
10system by water circulation through two horizontal wells: A case study in the Gonghe Basin,  
11Qinghai Province, China. *Energy* 148: 196-207.

12Yang SY and Yeh HD (2009) Modeling heat extraction from hot dry rock in a multi-well system.  
13*Applied Thermal Engineering* 29: 1676-1681.

14Yan X, Liu Y, Wang G, et al. (2019) Optimal injection rate of water in the Guide Basin hot dry  
15rock mining project. *Energy Exploration & Exploitation* 37(2): 721-735.

16Yang Y, Huo Y, Xia W, et al. (2017) Construction and preliminary test of a geothermal ORC  
17system using geothermal resource from abandoned oil wells in the Huabei oilfield of China.  
18*Energy* 140: 633-645.

19Zhang L, Ji H, Chen L, et al. (2019) Characteristics of geothermal reservoirs in the Wumishan  
20Formation and groundwater of the Middle-Upper Proterozoic and the geothermal status in the  
21Beijing–Tianjin–Hebei region: Implications for geothermal resources exploration. *Energy*  
22*Exploration & Exploitation* 37(2): 811-833.

### 23Figure captions

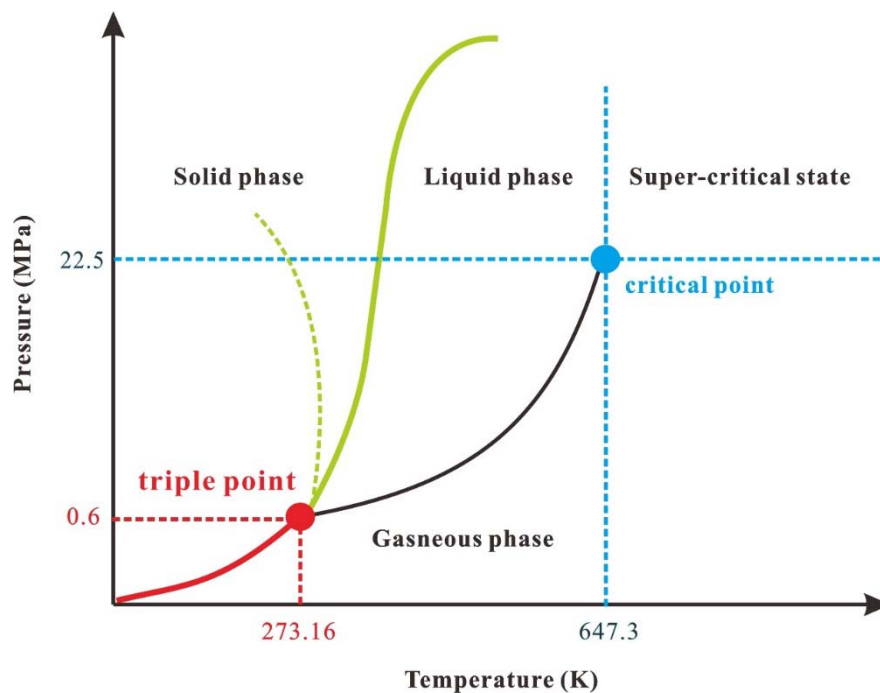

24  
25 **Figure 1.** The pressure-temperature phase diagram of water

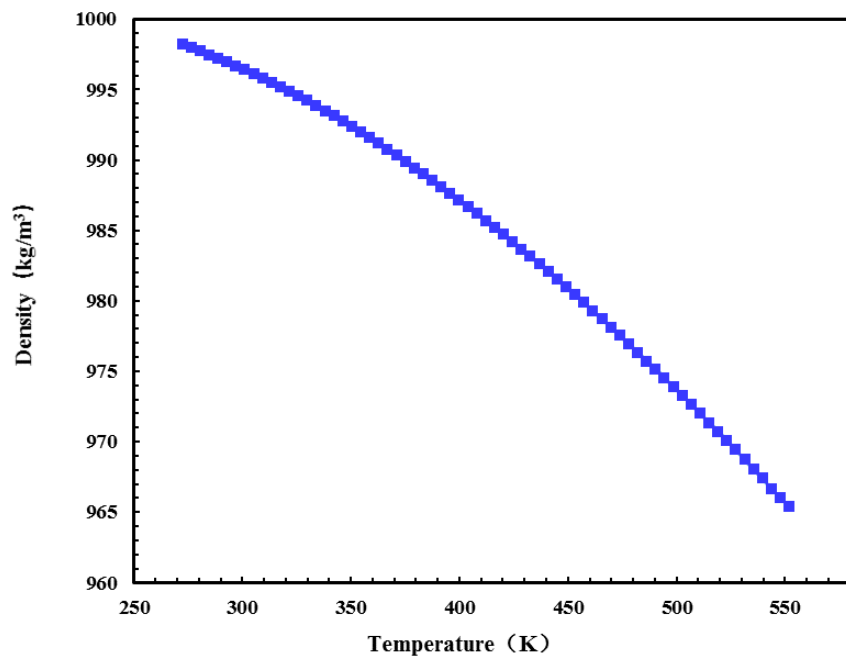

**Figure 2.** Variation curve of water density with temperature

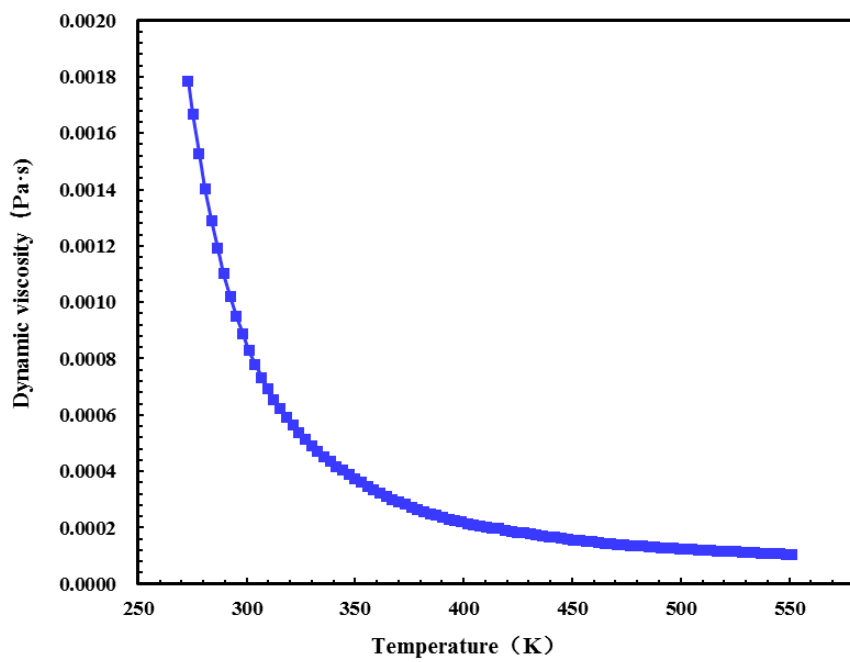

**Figure 3.** Variation curve of water dynamic viscosity with temperature

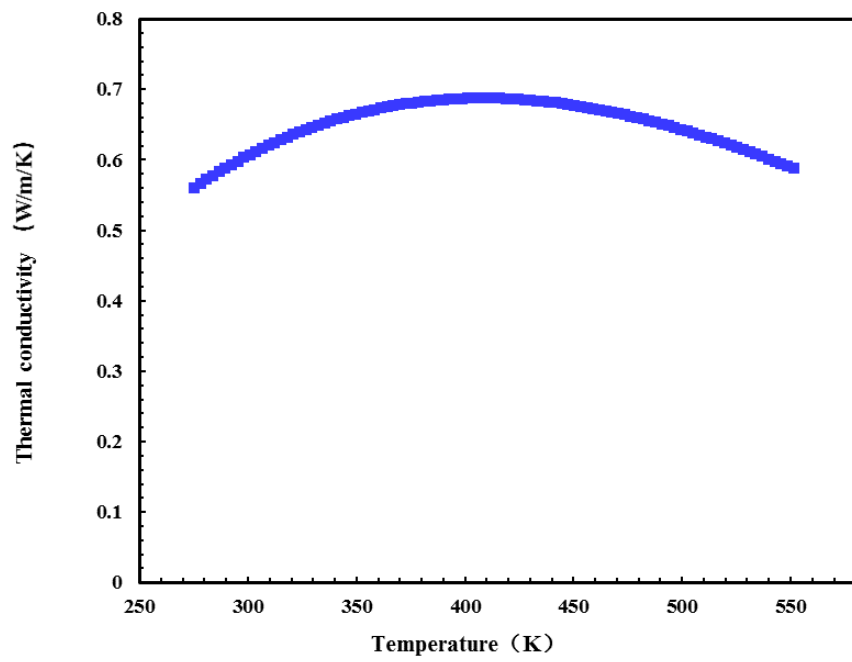

**Figure 4.** Variation curve of water thermal conductivity with temperature

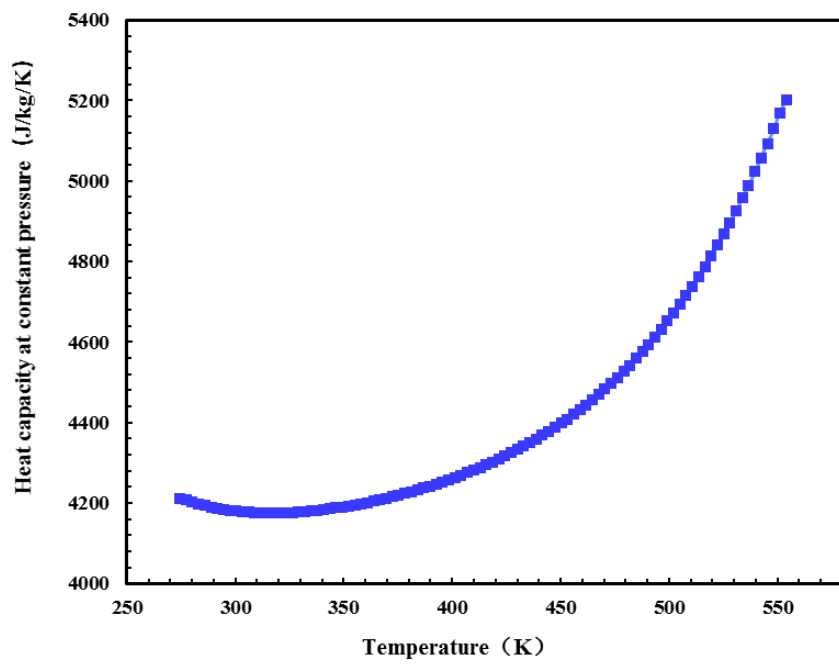

**Figure 5.** Variation curve of water heat capacity at constant pressure with temperature

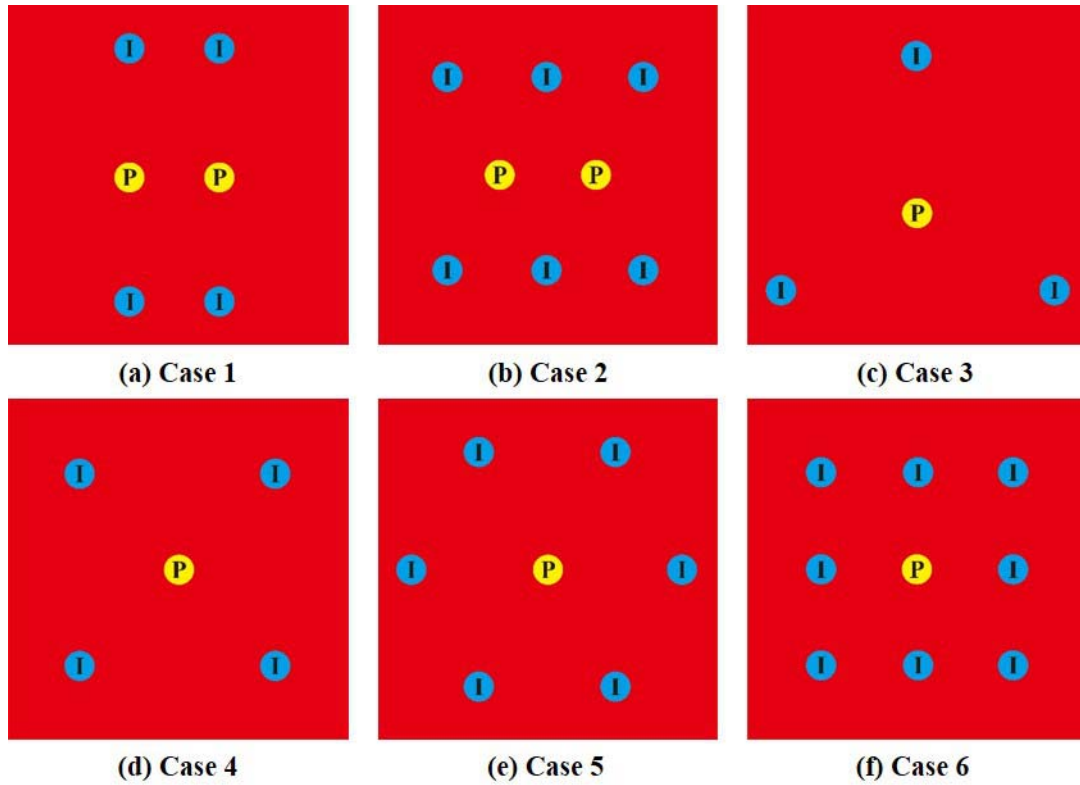

**Figure 6.** Schematic of different well array

Note: in the Figure 6, the red area represents HDR reservoir, the blue circles represent injection wells and the yellow circle represent production wells.

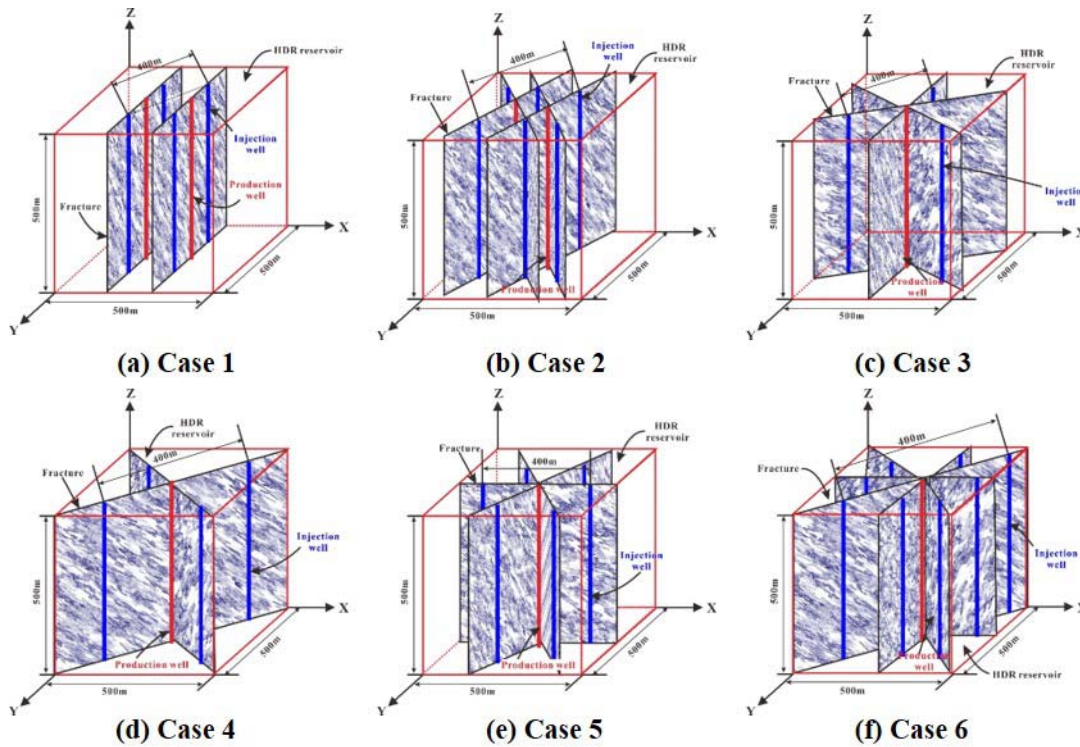

**Figure 7.** Schematic of the computational model



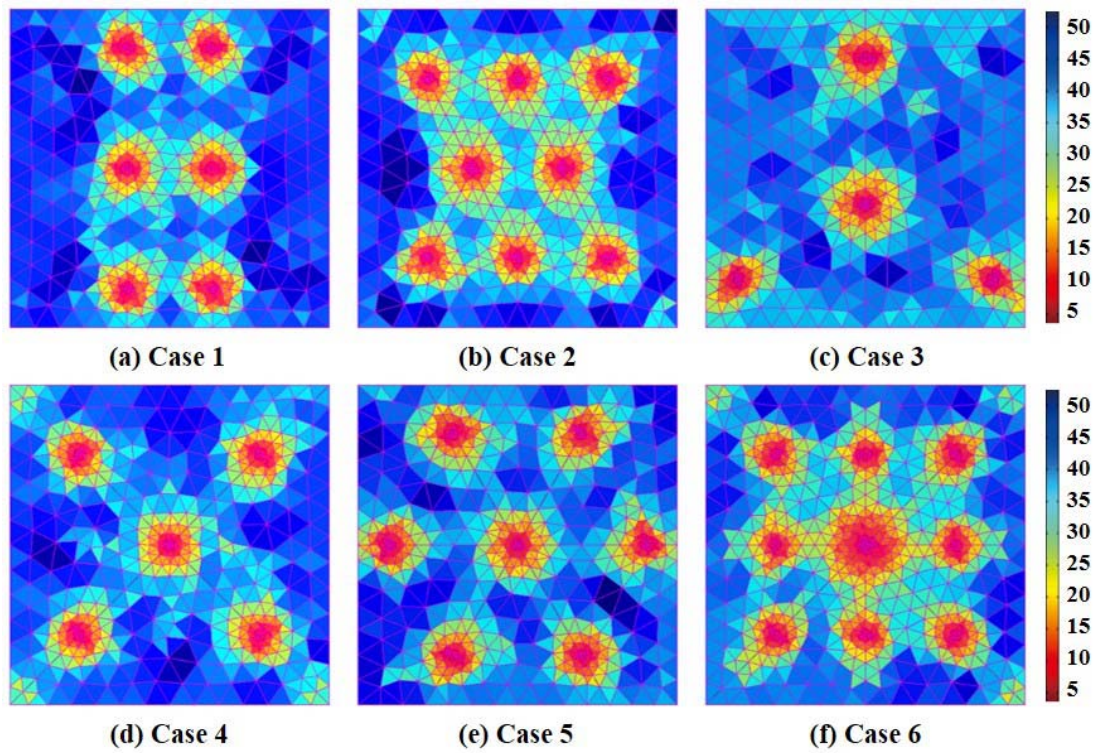

**Figure 8.** Mesh diagram of different well layout

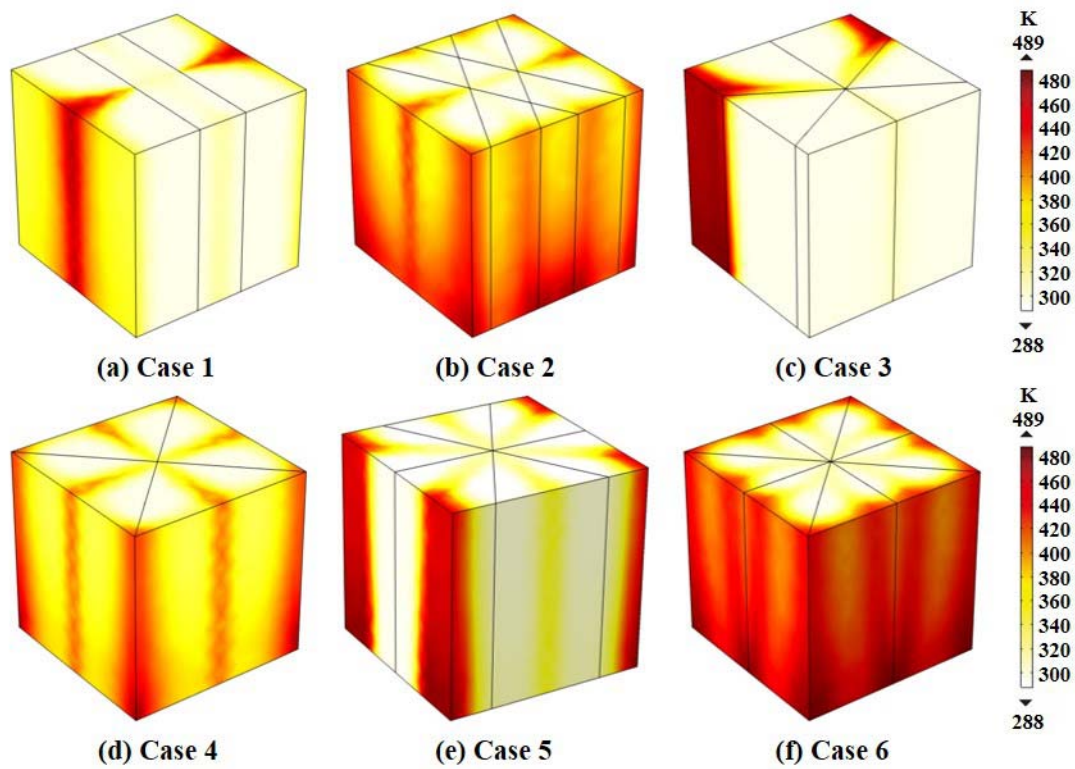

**Figure 9.** Temperature distribution of different well layout in the 30<sup>th</sup> year

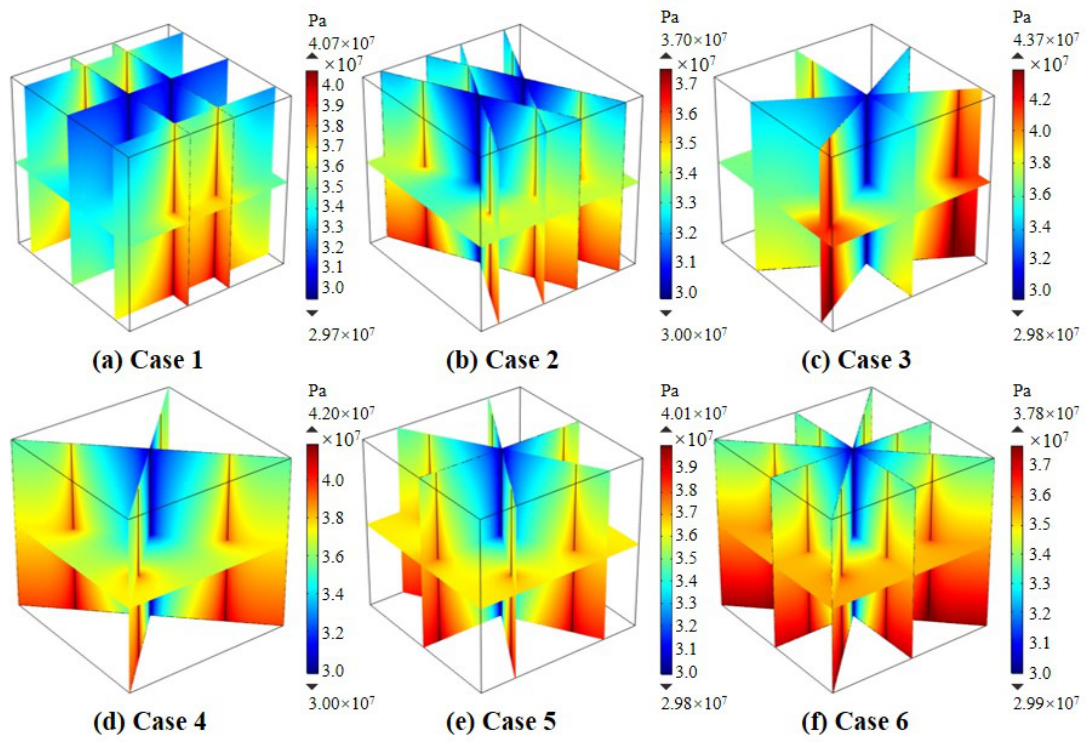

**Figure 10.** Pressure distribution of different well layout in the 30<sup>th</sup> year

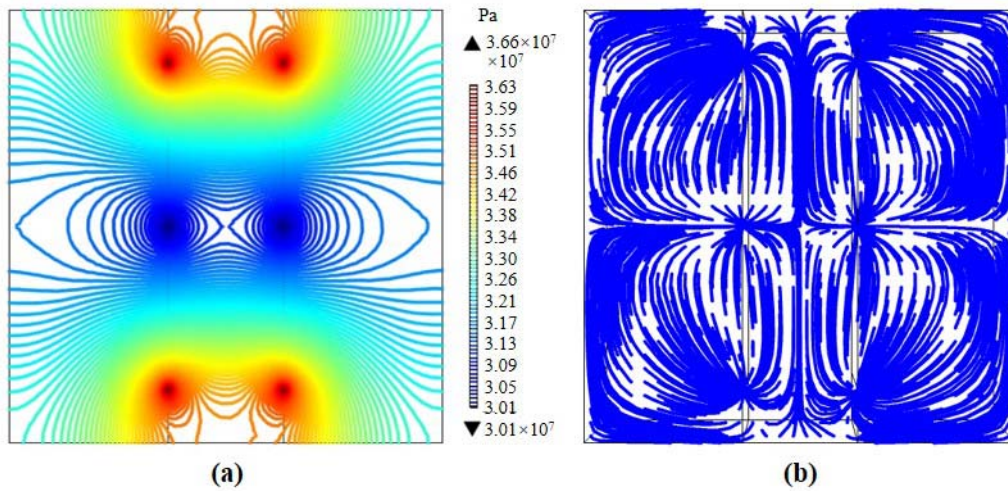

**Figure 11.** (a) Pressure contour; (b) Streamline of Case 1 in the 30<sup>th</sup> year



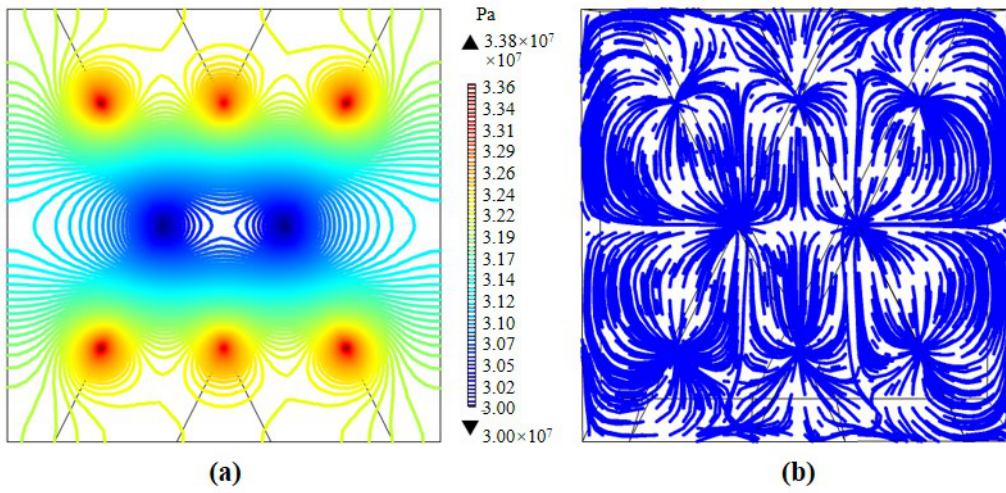

**Figure 12.** (a) Pressure contour; (b) Streamline of Case 2 in the 30<sup>th</sup> year

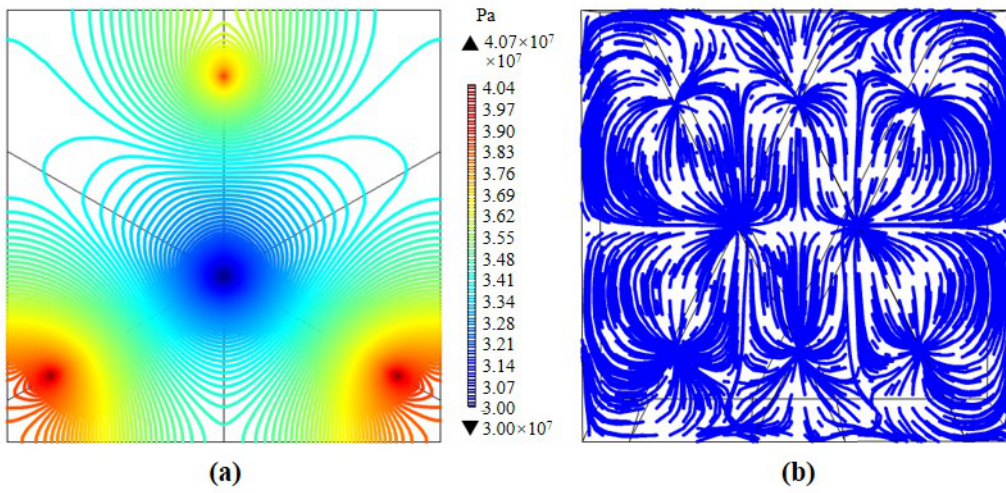

**Figure 13.** (a) Pressure contour; (b) Streamline of Case 3 in the 30<sup>th</sup> year

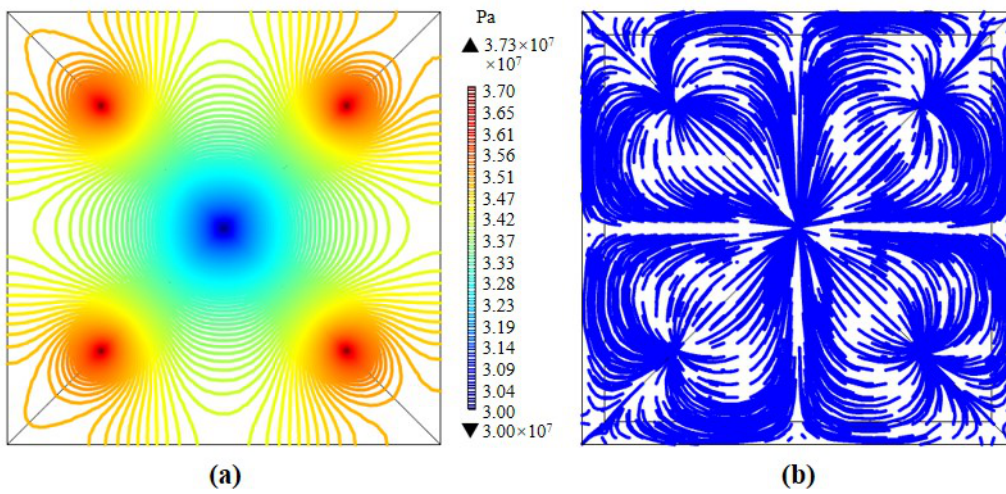

**Figure 14.** (a) Pressure contour; (b) Streamline of Case 4 in the 30<sup>th</sup> year

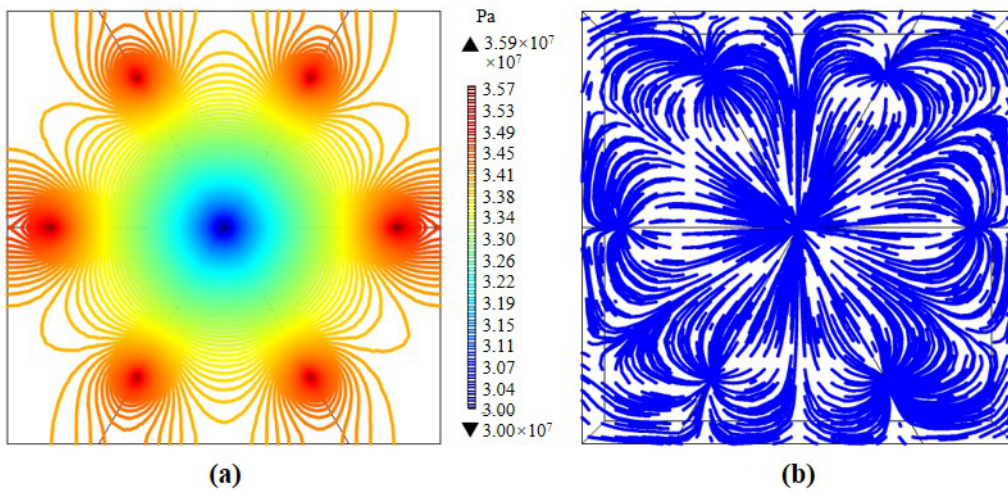

**Figure 15. (a) Pressure contour; (b) Streamline of Case 5 in the 30<sup>th</sup> year**

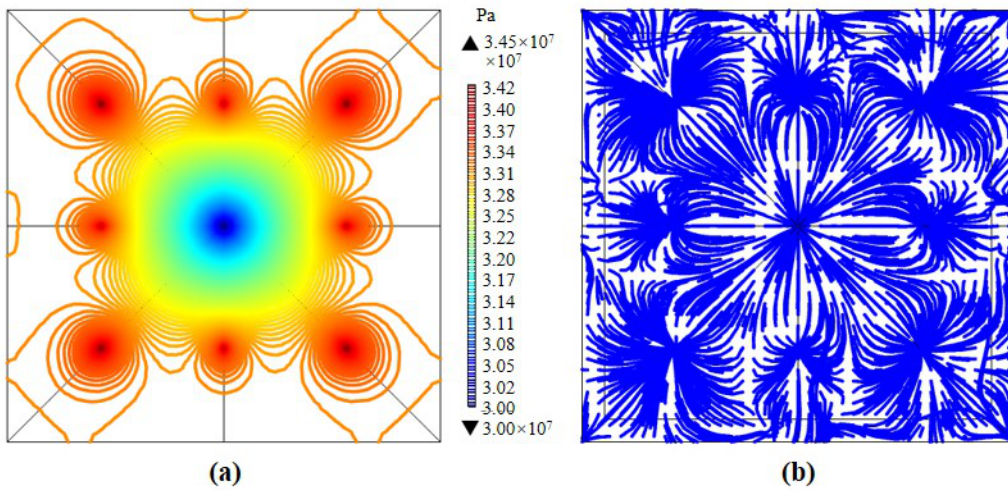

**Figure 16. (a) Pressure contour; (b) Streamline of Case 6 in the 30<sup>th</sup> year**



1

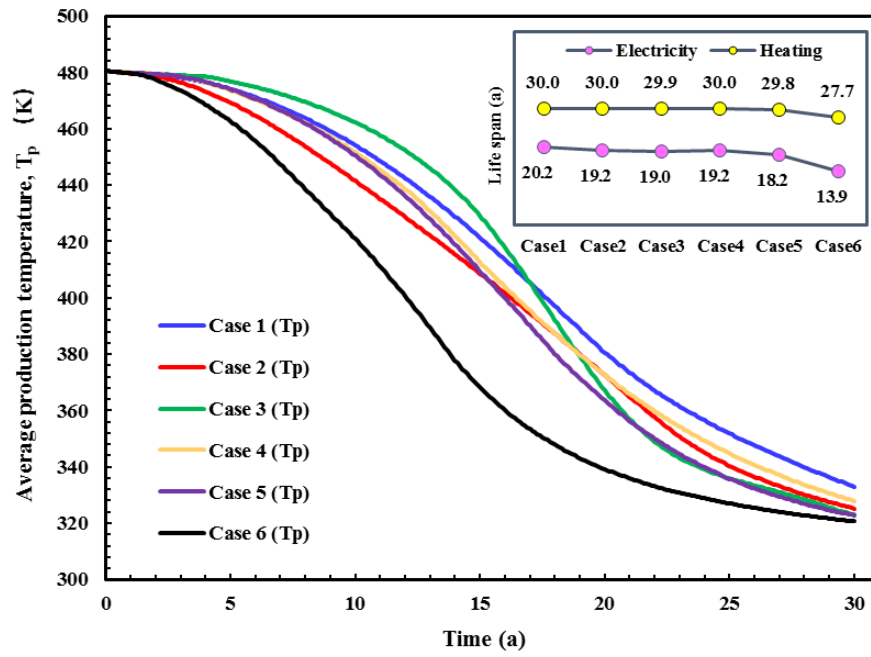

2

Figure 17. Average production temperature and life span

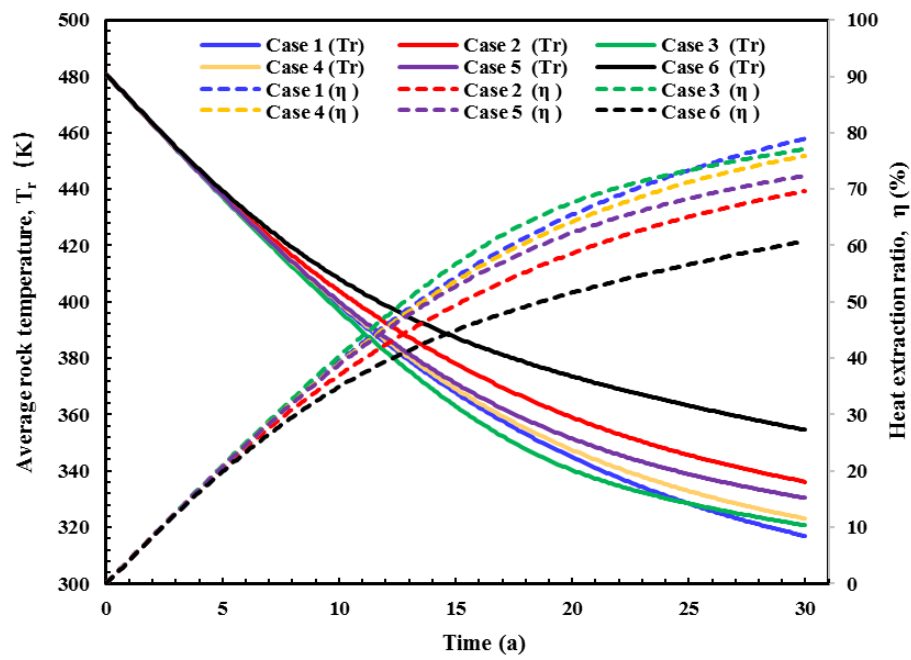

3

4

Figure 18. Average rock temperature and heat extraction ratio

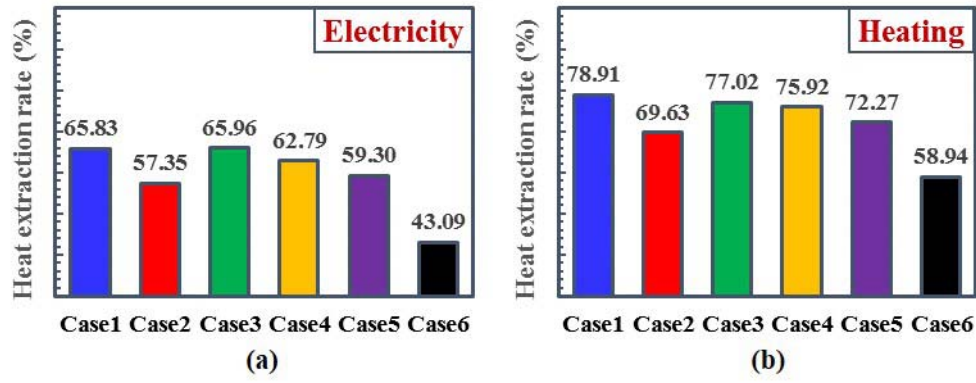

**Figure 19.** Heat extraction ratio for (a) Electricity generation and (b) Heating demand

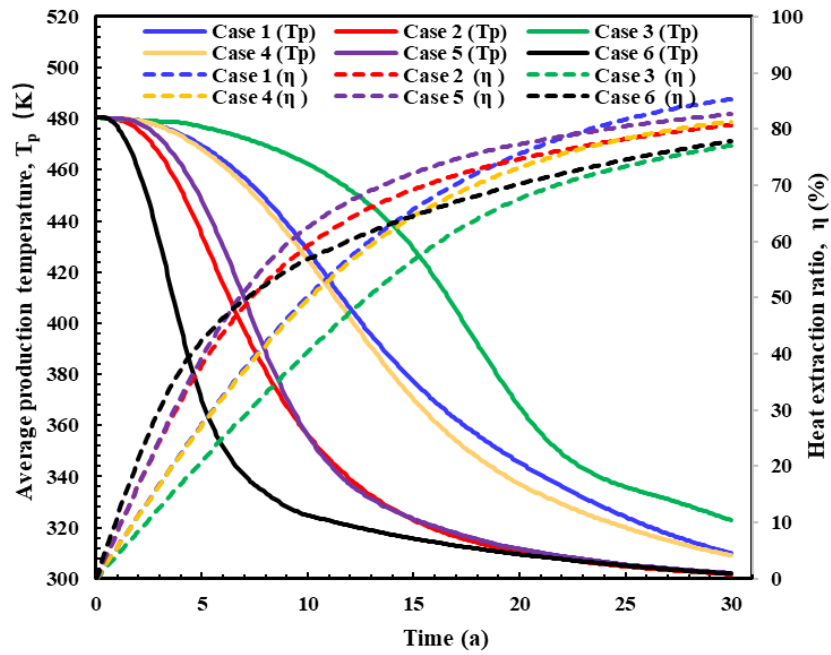

**Figure 20.** Average production temperature and heat extraction ratio under the single well injection mass flow rate is 40 kg/s

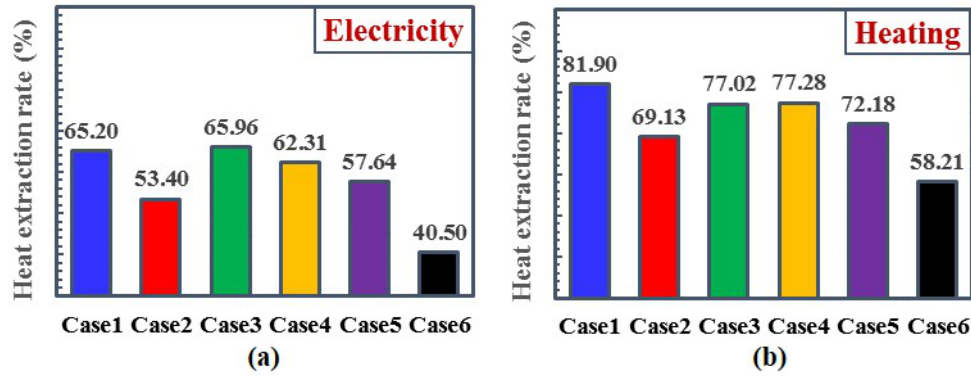

**Figure 21.** Heat extraction ratio for (a) Electricity and (b) Heating of different well layout under the single well injection mass flow rate is 40 kg/s

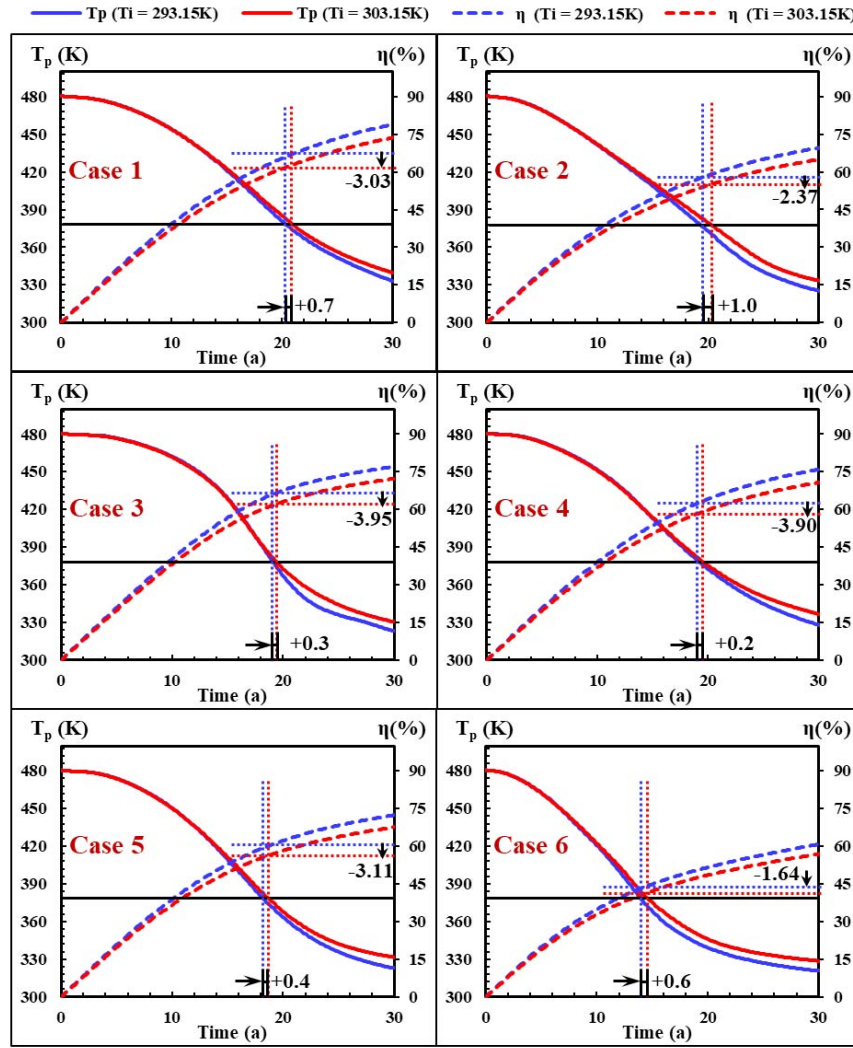

1  
2 **Figure 22.** Comparison of average production temperature and heat extraction ratio under the  
3 injection temperature is 293.15 K and 303.15 K

#### 4Tables

5 **Table 1.** The reservoir descriptions of computational model

| Description                        | HDR    | Fracture | Unit              |
|------------------------------------|--------|----------|-------------------|
| Density                            | 2700   | 2000     | kg/m <sup>3</sup> |
| Porosity                           | 0.08   | 1        | %                 |
| Permeability                       | 10e-15 | 10e-11   | m <sup>2</sup>    |
| Heat conductivity                  | 2.8    | 2.8      | W/(m·K)           |
| Heat capacity at constant pressure | 1000   | 850      | J/(kg·K)          |

6  
7 **Table 2.** The spatial descriptions of computational model

| Description | Case 1 | Case 2 | Case 3 | Case 4 | Case 5 | Case 6 |
|-------------|--------|--------|--------|--------|--------|--------|
|-------------|--------|--------|--------|--------|--------|--------|

|                        |                |        |        |        |        |        |
|------------------------|----------------|--------|--------|--------|--------|--------|
| HDR dimensions         | 500m×500m×500m |        |        |        |        |        |
| Injection well number  | 4              | 6      | 3      | 4      | 6      | 8      |
| Production well number | 2              | 2      | 1      | 1      | 1      | 1      |
| Well diameter          | 1m             | 1m     | 1m     | 1m     | 1m     | 1m     |
| Well length            | 500m           | 500m   | 500m   | 500m   | 500m   | 500m   |
| Maximum well spacing   | 400m           | 400m   | 400m   | 400m   | 400m   | 400m   |
| Fracture number        | 2              | 4      | 3      | 2      | 3      | 4      |
| Fracture aperture      | 0.001m         | 0.001m | 0.001m | 0.001m | 0.001m | 0.001m |
| Fracture height        | 500m           | 500m   | 500m   | 500m   | 500m   | 500m   |

**Table 3.** The corresponding descriptions of initial and boundary conditions

| Description                             | Value  | Unit  |
|-----------------------------------------|--------|-------|
| Initial temperature at the top boundary | 473.15 | K     |
| Geothermal gradient                     | 0.03   | K/m   |
| Injection temperature                   | 293.15 | K     |
| Initial pressure at the top boundary    | 40     | MPa   |
| Pressure gradient                       | 0.005  | MPa/m |
| Production pressure                     | 30     | MPa   |
| Injection mass flow rate                | 120    | kg/s  |

**Table 4.** Mesh of different well layout

| Description             | Case 1 | Case 2 | Case 3 | Case 4 | Case 5 | Case 6 |
|-------------------------|--------|--------|--------|--------|--------|--------|
| Minimum element quality | 0.2139 | 0.1901 | 0.1956 | 0.212  | 0.149  | 0.1835 |
| Average element quality | 0.6379 | 0.636  | 0.6406 | 0.6394 | 0.6344 | 0.6381 |
| Tetrahedron             | 137218 | 184761 | 102601 | 123124 | 154738 | 220493 |
| Triangle                | 14072  | 24628  | 14254  | 15034  | 19514  | 29664  |
| Edge element            | 1102   | 1540   | 912    | 972    | 1341   | 1685   |
| Vertex element          | 28     | 40     | 28     | 18     | 34     | 34     |
